# Supplementary material for: Characterization of chain conformations in perfluorosulfonic acid membranes using electron energy loss spectroscopy
Source: Royal Society of Chemistry journal article supplement (doi:10.1039/c4ra10012c), 2014-11-28
Supplement: c4ra10012c1.pdf [file c4ra10012c1.pdf]

## Supplementary Information

# Characterization of Chain Conformations in Perfluorosulfonic Acid Membranes using Electron Energy Loss Spectroscopy

Chen Wang <sup>a</sup>, Gerd Duscher <sup>b,c\*</sup> and Stephen J. Paddison <sup>a\*</sup>

<sup>a</sup> Department of Chemical and Biomolecular Engineering, University of Tennessee, Knoxville, TN 37996, USA

<sup>b</sup> Department of Materials Science and Engineering, University of Tennessee, Knoxville, TN, 37996, USA

<sup>c</sup> Oak Ridge National Laboratory, Material Science & Technology Division, Oak Ridge, TN, 35763, USA

\* Correspondence may be addressed to either: [guscher@utk.edu](mailto:guscher@utk.edu) or [spaddison@utk.edu](mailto:spaddison@utk.edu)

### S.1 Definition of repeat units

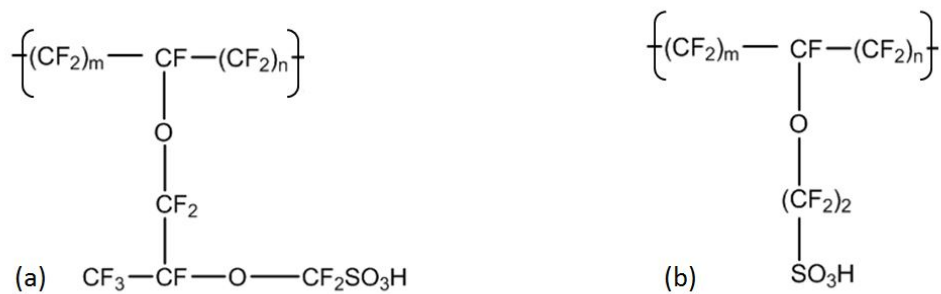

**Fig. S.1** The structures of repeat units of: (a) Nafion EW=1244 and (b) Aquivion EW=828. The EW is determined by the selection of m and n, where m = 8 and n= 7.

## S.2 Optimized structures of the repeat units

### S.2.1 Coordinates of Nafion with defected helical conformation

| Atom | X (Å)       | Y (Å)       | Z (Å)       |
|------|-------------|-------------|-------------|
| C    | -0.21900800 | -0.30371000 | 0.07641900  |
| C    | 0.42549700  | 0.25883600  | 1.37908200  |
| C    | -0.26677500 | -0.18722800 | 2.70783700  |
| C    | 0.58027000  | 0.10255800  | 3.99308100  |
| C    | -0.22814100 | -0.00590200 | 5.33420600  |
| C    | 0.69055600  | -0.12392500 | 6.60197300  |
| C    | -0.04557400 | 0.16705200  | 7.95653400  |
| C    | 0.71798400  | -0.33183800 | 9.25059600  |
| C    | 0.03897800  | 0.19670700  | 10.57898500 |
| C    | 0.62595800  | -0.34030900 | 11.93130600 |
| C    | -0.25651900 | -0.00758000 | 13.19018500 |
| C    | 0.53320000  | -0.12286600 | 14.54148600 |
| C    | -0.38075700 | -0.22777100 | 15.81049200 |
| C    | 0.37279600  | 0.08129300  | 17.14982700 |
| C    | -0.36153600 | -0.42548000 | 18.43207700 |
| C    | 0.17149700  | 0.19141400  | 19.76188500 |
| F    | -1.51869800 | 0.00280500  | 0.02709600  |
| F    | -0.07749600 | -1.62679800 | -0.00000300 |
| F    | 1.71679200  | -0.14576200 | 1.39968800  |
| F    | 0.37834600  | 1.60730500  | 1.30192200  |
| F    | -1.44864900 | 0.46584000  | 2.80523100  |
| F    | -0.49889300 | -1.51886500 | 2.64675300  |
| F    | 1.59799900  | -0.78755400 | 4.03097600  |
| F    | 1.08048500  | 1.35568700  | 3.90535300  |
| F    | -1.00034300 | 1.09781400  | 5.45300200  |
| F    | -1.01859700 | -1.10185800 | 5.28049800  |
| F    | 1.19070800  | -1.37980400 | 6.63504500  |
| F    | 1.70112200  | 0.76551800  | 6.47637600  |
| F    | -0.24472100 | 1.49904000  | 8.03909700  |
| F    | -1.24268000 | -0.46475800 | 7.92509200  |
| F    | 0.66403900  | -1.68657900 | 9.24078800  |

|   |             |             |             |
|---|-------------|-------------|-------------|
| F | 0.15518200  | 1.54142000  | 10.59709600 |
| F | -1.27301600 | -0.14431600 | 10.54013500 |
| F | 0.74957700  | -1.68336800 | 11.86993100 |
| F | 1.84664100  | 0.22160700  | 12.10772600 |
| F | -0.73138900 | 1.25340500  | 13.08964800 |
| F | -1.29430100 | -0.87444000 | 13.21523200 |
| F | 1.31323900  | -1.22716000 | 14.49685300 |
| F | 1.31431300  | 0.97513800  | 14.66303600 |
| F | -1.40057900 | 0.65228700  | 15.68899900 |
| F | -0.87824700 | -1.48409300 | 15.86969600 |
| F | 1.59209600  | -0.50466600 | 17.11059700 |
| F | 0.52596000  | 1.42274100  | 17.24643300 |
| F | -1.67812300 | -0.12462300 | 18.33599500 |
| F | -0.21305300 | -1.76525000 | 18.51045700 |
| F | 1.50570200  | 0.13109500  | 19.80650400 |
| F | -0.21410100 | 1.46139600  | 19.88410200 |
| F | 0.38885800  | 0.21560900  | -0.99005100 |
| F | -0.30586300 | -0.48125900 | 20.81288600 |
| C | 4.36221300  | 0.31453200  | 9.65612900  |
| O | 2.03614900  | 0.16946100  | 9.19493700  |
| C | 5.58119500  | -0.46670100 | 10.27225100 |
| C | 3.14998500  | -0.62456700 | 9.35020100  |
| F | 6.69671700  | 0.25576500  | 10.11615300 |
| F | 3.96533800  | 1.19141600  | 10.60802800 |
| F | 5.74860200  | -1.66549100 | 9.70158500  |
| F | 3.40323200  | -1.34535200 | 8.23679800  |
| F | 5.36562000  | -0.64778000 | 11.57883700 |
| F | 3.01943000  | -1.49817500 | 10.37364900 |
| O | 4.70588800  | 1.13893900  | 8.57138900  |
| C | 5.28121300  | 0.75120100  | 7.38238800  |
| F | 6.04041700  | -0.35160200 | 7.49576400  |
| C | 6.17290500  | 1.93522200  | 6.91809200  |
| F | 4.34319000  | 0.51493000  | 6.44354400  |
| S | 6.79249600  | 1.74329000  | 5.15243700  |

|   |            |            |            |
|---|------------|------------|------------|
| F | 7.23873400 | 2.01841600 | 7.72777600 |
| F | 5.47247100 | 3.08167100 | 6.96589700 |
| O | 5.70759100 | 2.09291200 | 4.24689300 |
| O | 7.53252700 | 0.50060100 | 5.08261400 |
| O | 7.87581500 | 2.96575200 | 5.15217000 |
| H | 7.46075400 | 3.72945900 | 4.70555200 |

### S.2.2 Coordinates of Nafion with H136 helical conformation

| Atom | X (Å)       | Y (Å)       | Z (Å)       |
|------|-------------|-------------|-------------|
| C    | 0.74820100  | 0.02745000  | 7.88231000  |
| C    | 0.50182200  | 0.47539700  | 5.28754400  |
| C    | 0.19682300  | 0.67615800  | 2.68742900  |
| C    | 0.05330300  | 0.43911200  | 0.00001500  |
| C    | 0.09112400  | 0.41927100  | 14.41804400 |
| C    | 0.02803500  | 0.35167100  | 11.81951400 |
| C    | -0.05929900 | 0.16887100  | 9.22455400  |
| C    | -0.21611600 | 0.12687700  | 6.63678100  |
| C    | -0.32732800 | 0.05996900  | 4.03366300  |
| C    | -0.16514100 | -0.19263500 | 1.45524300  |
| C    | 0.05329100  | -0.43910200 | 15.74419200 |
| C    | 0.48048900  | -0.36963400 | 13.12881300 |
| C    | 0.72205400  | -0.19047000 | 10.52687300 |
| F    | 1.63487400  | 1.05188000  | 7.82801200  |
| F    | 0.71793400  | 1.80967200  | 5.25554700  |
| F    | -0.33886500 | 1.91003100  | 2.54850100  |
| F    | -0.93960100 | 1.34609700  | -0.08700300 |
| F    | -1.11272000 | 0.98517100  | 14.20283700 |
| F    | -1.30889100 | 0.19174000  | 11.69043500 |
| F    | -1.14648400 | -0.63052600 | 9.15035100  |
| F    | -0.85714800 | -1.05510800 | 6.50957400  |
| F    | -0.28174400 | -1.29040400 | 3.95271000  |
| F    | 0.60276200  | -1.31078800 | 1.51095900  |
| F    | 1.23440300  | -1.08210000 | 15.65890300 |
| F    | 1.82427400  | -0.52853300 | 13.09447700 |

|   |             |             |             |
|---|-------------|-------------|-------------|
| F | 1.96169700  | 0.34933400  | 10.45410600 |
| F | 1.69061900  | -0.16857800 | 5.22865600  |
| F | 1.54600000  | 0.78729000  | 2.74792100  |
| F | 1.23440100  | 1.08209900  | 0.08529800  |
| F | 1.01215200  | 1.39810200  | 14.62259900 |
| F | 0.31754900  | 1.66884800  | 11.93018200 |
| F | -0.44910000 | 1.46231600  | 9.32884300  |
| F | -1.13089400 | 1.09774800  | 6.86038100  |
| F | -1.61032500 | 0.45209300  | 4.20582400  |
| F | -1.47260800 | -0.55519600 | 1.55249300  |
| F | -0.93959700 | -1.34611700 | 15.83119300 |
| F | -0.11238700 | -1.58523200 | 13.17222800 |
| F | 0.81816900  | -1.53531800 | 10.61509300 |
| O | 1.34500900  | -1.24759400 | 7.82409300  |
| C | 2.87228300  | -2.89519400 | 7.07329300  |
| C | 4.37644800  | -3.20370500 | 6.73033200  |
| C | 2.69200300  | -1.53119600 | 7.81695900  |
| F | 4.52244800  | -4.51753400 | 6.51980800  |
| F | 2.23355800  | -2.78721500 | 5.88405700  |
| F | 5.20460400  | -2.82286900 | 7.71004900  |
| F | 3.17392800  | -1.63378100 | 9.07580300  |
| F | 4.71447800  | -2.54870800 | 5.61516600  |
| F | 3.43365900  | -0.60741200 | 7.17534200  |
| O | 2.21540900  | -3.96742100 | 7.70159800  |
| C | 2.51358800  | -4.50441800 | 8.93118700  |
| F | 3.81473000  | -4.39488800 | 9.25356800  |
| C | 2.13540200  | -6.00883500 | 8.86040000  |
| F | 1.79081200  | -3.91667600 | 9.90621600  |
| S | 2.17841900  | -6.86112500 | 10.53646100 |
| F | 3.00128800  | -6.63703300 | 8.05188700  |
| F | 0.88499200  | -6.14465100 | 8.38493200  |
| O | 0.98771700  | -6.47195900 | 11.27799700 |
| O | 3.52544300  | -6.74197200 | 11.05426400 |
| O | 1.98223200  | -8.39773000 | 10.01797500 |

H 1.04122800 -8.63301900 10.13667400

### S.2.3 Coordinates of Aquivion with defected helical conformation

| Atom | X (Å)       | Y (Å)       | Z (Å)       |
|------|-------------|-------------|-------------|
| C    | -0.21900500 | -0.30371200 | 0.07641500  |
| C    | 0.43901600  | 0.23909100  | 1.38050000  |
| C    | -0.35206400 | -0.06965400 | 2.69381200  |
| C    | 0.52913700  | 0.01836800  | 3.98518200  |
| C    | -0.28777500 | 0.17919800  | 5.31399000  |
| C    | 0.54787400  | -0.20353000 | 6.59349200  |
| C    | -0.00024900 | 0.41185500  | 7.93061500  |
| C    | 0.72683000  | -0.06787100 | 9.25035800  |
| C    | -0.10677800 | 0.28398700  | 10.56039400 |
| C    | 0.63966800  | 0.04250800  | 11.91948700 |
| C    | -0.30833400 | -0.03597900 | 13.16979000 |
| C    | 0.45486800  | 0.12635900  | 14.53088600 |
| C    | -0.37983300 | -0.27448200 | 15.79639600 |
| C    | 0.26545500  | 0.20526300  | 17.14215300 |
| C    | -0.34479300 | -0.43412300 | 18.42998700 |
| C    | 0.17149600  | 0.19141100  | 19.76188900 |
| F    | -1.51869900 | 0.00280500  | 0.02709600  |
| F    | -0.07749700 | -1.62679700 | -0.00000200 |
| F    | 1.67212500  | -0.31601200 | 1.46442800  |
| F    | 0.56113700  | 1.57835300  | 1.26156400  |
| F    | -1.37013900 | 0.81586500  | 2.78702500  |
| F    | -0.85923900 | -1.32187200 | 2.61522000  |
| F    | 1.26776700  | -1.11262800 | 4.05862400  |
| F    | 1.35226700  | 1.08716900  | 3.87446500  |
| F    | -0.69983600 | 1.46285400  | 5.39512900  |
| F    | -1.36957300 | -0.63089000 | 5.26711200  |
| F    | 0.54176300  | -1.54936900 | 6.67982100  |
| F    | 1.82270000  | 0.22345300  | 6.41988600  |
| F    | 0.12093500  | 1.75708700  | 7.85854500  |
| F    | -1.31275800 | 0.08732400  | 8.00731600  |

|   |             |             |             |
|---|-------------|-------------|-------------|
| F | 0.77368700  | -1.42254000 | 9.22155800  |
| F | -0.53119400 | 1.56304600  | 10.51422400 |
| F | -1.18750200 | -0.53419100 | 10.54932500 |
| F | 1.32784100  | -1.11657400 | 11.83506200 |
| F | 1.50416200  | 1.06528900  | 12.11749000 |
| F | -1.22948200 | 0.94952500  | 13.07747900 |
| F | -0.92999900 | -1.23587300 | 13.16166300 |
| F | 1.55996000  | -0.65365700 | 14.49149100 |
| F | 0.82085700  | 1.42223900  | 14.65587100 |
| F | -1.61124400 | 0.27630900  | 15.69623500 |
| F | -0.49324000 | -1.62142200 | 15.82206300 |
| F | 1.58638100  | -0.09079600 | 17.11390700 |
| F | 0.10993600  | 1.54669300  | 17.22825700 |
| F | -1.68999200 | -0.29160600 | 18.39219000 |
| F | -0.03284000 | -1.74860400 | 18.45691000 |
| F | 1.50570200  | 0.13109600  | 19.80650300 |
| F | -0.21410000 | 1.46139700  | 19.88410100 |
| F | 0.38885700  | 0.21560900  | -0.99004900 |
| F | -0.30586300 | -0.48125800 | 20.81288400 |
| O | 2.08420800  | 0.31211300  | 9.23599400  |
| C | 2.67529900  | 1.53925100  | 9.48725800  |
| F | 1.79976800  | 2.49614000  | 9.82103800  |
| C | 3.49304500  | 2.01830200  | 8.24947700  |
| F | 3.54989300  | 1.36925800  | 10.49966700 |
| S | 4.79693100  | 3.30169800  | 8.70616300  |
| F | 2.67181000  | 2.58212900  | 7.35224500  |
| F | 4.14096000  | 0.98125400  | 7.69450600  |
| O | 5.95654700  | 2.61334300  | 9.25436200  |
| O | 4.11400000  | 4.39205300  | 9.37165000  |
| O | 5.16851700  | 3.79949800  | 7.19478300  |
| H | 6.00629800  | 3.36593200  | 6.93969600  |

#### S.2.4 Coordinates of Aquivion with H136 helical conformation

| Atom | X (Å) | Y (Å) | Z (Å) |
|------|-------|-------|-------|
|------|-------|-------|-------|



|   |             |             |             |
|---|-------------|-------------|-------------|
| C | 0.61918800  | 0.11822200  | 7.88231700  |
| C | 0.41887500  | 0.57771700  | 5.29281500  |
| C | 0.17810800  | 0.69639200  | 2.68303400  |
| C | 0.05330400  | 0.43912000  | 0.00002600  |
| C | 0.09324400  | 0.42051300  | 14.41850500 |
| C | -0.01971000 | 0.35705000  | 11.82406800 |
| C | -0.18267400 | 0.20752500  | 9.23411100  |
| C | -0.33052100 | 0.22871000  | 6.63297900  |
| C | -0.35188300 | 0.09101200  | 4.02909700  |
| C | -0.16309000 | -0.18854600 | 1.45585300  |
| C | 0.05328300  | -0.43910300 | 15.74418400 |
| C | 0.44989700  | -0.37341300 | 13.12189000 |
| C | 0.63266600  | -0.18522100 | 10.51123200 |
| F | 1.43100600  | 1.20595400  | 7.84000900  |
| F | 0.56188100  | 1.92023900  | 5.22972100  |
| F | -0.36898400 | 1.92353000  | 2.52733500  |
| F | -0.93960300 | 1.34609600  | -0.08700500 |
| F | -1.09976300 | 1.01361800  | 14.21901400 |
| F | -1.36145100 | 0.21435400  | 11.72528200 |
| F | -1.26625000 | -0.59699800 | 9.15893700  |
| F | -1.02735300 | -0.92243700 | 6.49370000  |
| F | -0.24846200 | -1.25701700 | 3.98414600  |
| F | 0.62100500  | -1.29396400 | 1.52349200  |
| F | 1.23440500  | -1.08210000 | 15.65890700 |
| F | 1.79081600  | -0.54937800 | 13.06321300 |
| F | 1.88293600  | 0.31903300  | 10.41483800 |
| F | 1.64366800  | 0.00541000  | 5.29456300  |
| F | 1.52522500  | 0.82203900  | 2.75750300  |
| F | 1.23440100  | 1.08209600  | 0.08529700  |
| F | 1.03806500  | 1.37853200  | 14.61341200 |
| F | 0.29167400  | 1.66940000  | 11.93377100 |
| F | -0.58811400 | 1.49064500  | 9.38367000  |
| F | -1.21110700 | 1.22679900  | 6.86900400  |
| F | -1.65414700 | 0.43660000  | 4.16222000  |

|   |             |             |             |
|---|-------------|-------------|-------------|
| F | -1.46545700 | -0.57039900 | 1.54810900  |
| F | -0.93959600 | -1.34612800 | 15.83118900 |
| F | -0.15547100 | -1.58269900 | 13.17404100 |
| F | 0.69856800  | -1.53526100 | 10.58428900 |
| O | 1.50662400  | -0.97928500 | 7.88328800  |
| C | 1.22576600  | -2.28516400 | 7.55894500  |
| F | 0.12445400  | -2.74697200 | 8.17478700  |
| C | 2.46027000  | -3.11579200 | 8.01042500  |
| F | 1.06549500  | -2.45879200 | 6.22791800  |
| S | 2.41951700  | -4.88646400 | 7.37018700  |
| F | 2.50794800  | -3.16233000 | 9.34830100  |
| F | 3.58487400  | -2.55464800 | 7.53314700  |
| O | 2.81499200  | -4.87820400 | 5.96924500  |
| O | 1.20497300  | -5.50233200 | 7.86238800  |
| O | 3.66459100  | -5.47427600 | 8.24986200  |
| H | 4.45101800  | -5.49703600 | 7.67027100  |
